## **Correction: *Listeria monocytogenes* Traffics from Maternal Organs to the Placenta and Back**

Anna I. Bakardjiev, Julie A. Theriot, Daniel A. Portnoy

DOI: 10.1371/journal.ppat.0020066

In *PLoS Pathogens*, volume 2, issue 6:

The PDF version of the above article states that a previous version was published as an Early Online Release on June 23, 2006. This information appeared in error. No previous version of the article has been published.

This correction note may be found online at DOI: 10.1371/journal.ppat.0020080.

Published July 28, 2006.

Citation: Correction: *Listeria monocytogenes* traffics from maternal organs to the placenta and back. *PLoS Pathog* 2(7): e80.

DOI: 10.1371/journal.ppat.0020080
